# Supplementary material
Source: publisher site journal article supplement (https://www.dovepress.com/article/111846)
Supplement: Supplementary file 1 [file get_supplementary_file.php]

# Double-edged Role of GPER1 in Breast Cancer Prognosis: an Analysis of 167 Breast Cancer Samples and Datasets Online

## Supplementary

Fig S1

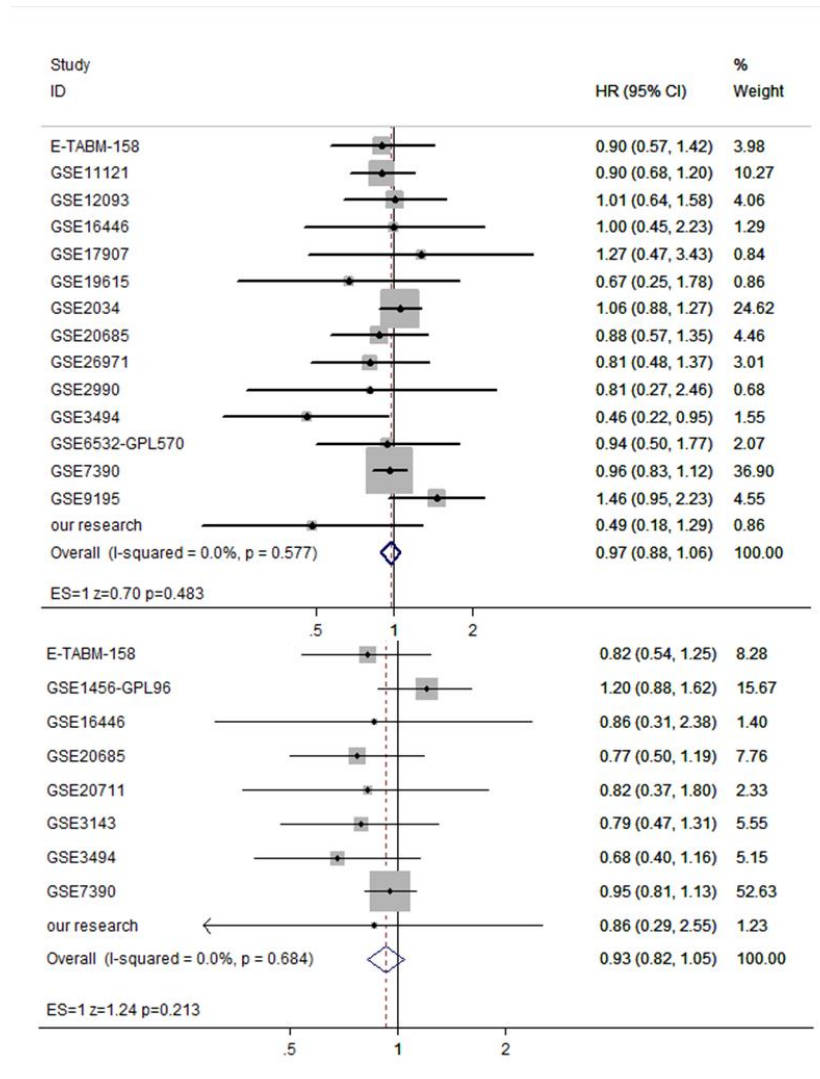

**Fig S2**

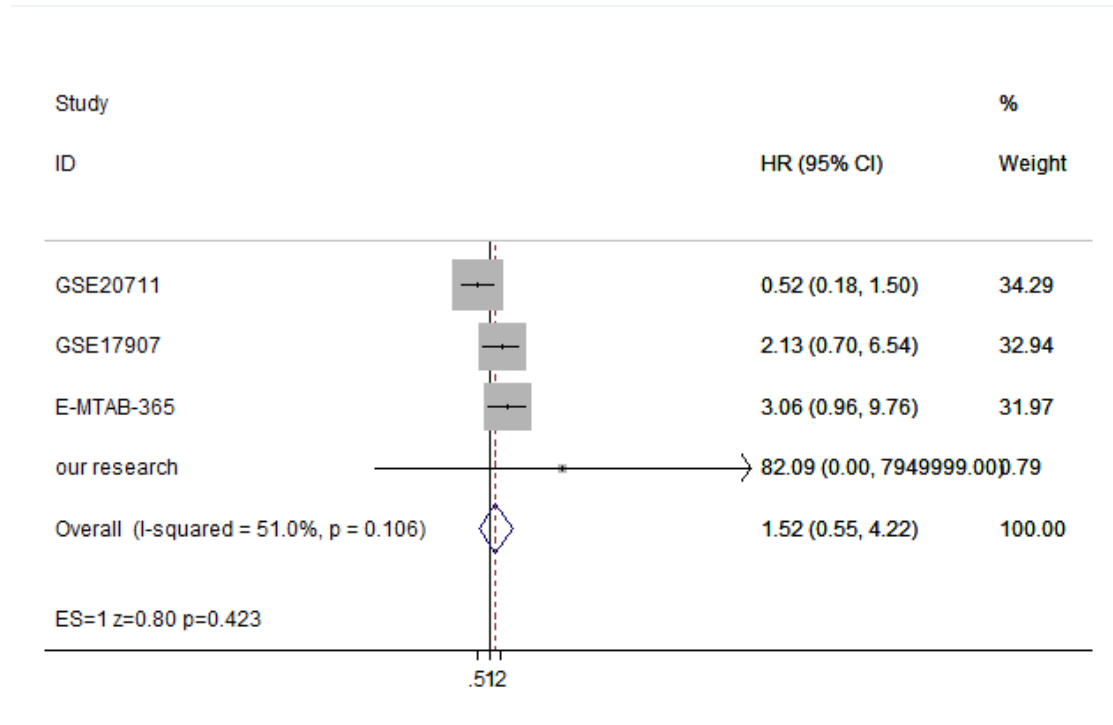

**Fig S1. Forest plots of DMFS (upper) and OS (lower) analysis in online datasets combined with our research:** No significant relationship found between GPER1 and DMFS/OS ( $p=0.483$  &  $p=0.213$  respectively).

**Fig S2. Forest plots of RFS analysis for HER2 overexpressed patients in online datasets combined with our research:** No significant relationship found between GPER1 and RFS in HER2 overexpressed patients ( $p=0.432$ ).
